# Supplementary material for: Triad and cyclic diad compounds of [60]fullerene with metallocenes
Source: Royal Society of Chemistry journal article supplement (doi:10.1039/c3dt32626h), 2013-01-01
Supplement: c3dt32626h.pdf [file c3dt32626h.pdf]

## Supporting Information

### Triad and Cyclic Diad Compounds of [60]Fullerene with Metallocenes

Dorothee Mancel, Martyn Jevric, E. Stephen Davies, Martin Schröder and Andrei N. Khlobystov

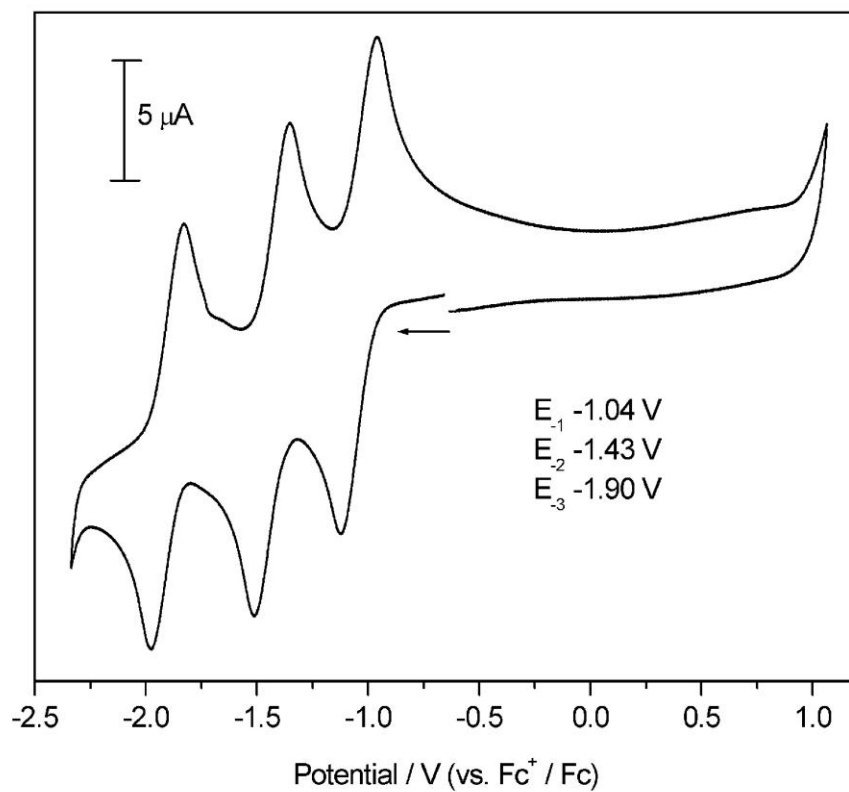

**Figure S1.** Cyclic voltammogram of 1.0 mM solution of  $\text{C}_{60}$  in o-DCB containing 0.2 M  $[\text{NnBu}_4][\text{BF}_4]$  at 293K
